# Supplementary material
Source: publisher figshare collection journal article supplement (https://gsajournals.figshare.com/ndownloader/files/21839058)
Supplement: Supplementary file 1 [file 21839058]

## Sheet: Cetromere Positions
Table S2: Centromere Mapping Locations Centromere intervals for linkage groups Sna1-Sna42 based on half-tetrad analysis and a y-threshold of 0.1 (Centromere Interval (HT)) and the RFm method with a RFm threshold of 0.45 (Centromere Interval (RFm)). Interval units are centimorgans (cM) on the female linkage map. Centromere mapping intervals are the same as those identified with orange and blue box…
Linkage Group	Centricity	Centromere Interval (HT)	Centromere Interval (RFm)
Sna1	metacentric	55.07-67.24	49.4-61.56
Sna2	metacentric	58.36-66.28	47.9-87.49
Sna3	metacentric	75.68-81.32	54.66-88.76
Sna4	metacentric	46.35-56.64	46.63-61.45
Sna5	metacentric	56.17-56.45	46.85-62.09
Sna6	metacentric	na	45.6-58.92
Sna7	metacentric	65.65-71.35	48.59-81.86
Sna8	metacentric	66.36-77.22	61.21-79.2
Sna9	acrocentric or telocentric	1.87-11.9	0-11.9
Sna10	acrocentric or telocentric	na	49.26-55.02
Sna11	acrocentric or telocentric	2.29-7.13	0-12.58
Sna12	acrocentric or telocentric	48.75-51.57	47.63-54.69
Sna13	acrocentric or telocentric	4.57-14.47	0-7.41
Sna14	acrocentric or telocentric	na	45.83-51.85
Sna15	acrocentric or telocentric	17.24-17.24	0-15.24
Sna16	acrocentric or telocentric	na	0-8.16
Sna17	acrocentric or telocentric	51.11-51.11	50.27-57.73
Sna18	acrocentric or telocentric	43.55-48.96	46.09-58.01
Sna19	acrocentric or telocentric	na	46.28-53.32
Sna20	acrocentric or telocentric	0-24.75	0-7.97
Sna21	acrocentric or telocentric	3.79-3.79	0-15.61
Sna22	acrocentric or telocentric	na	0-29.58
Sna23	acrocentric or telocentric	50.11-50.39	46.69-56.31
Sna24	acrocentric or telocentric	na	0-23.36
Sna25	acrocentric or telocentric	na	0-8.17
Sna26	acrocentric or telocentric	46.16-50.98	48.44-52.1
Sna27	acrocentric or telocentric	0-3.77	0-3.77
Sna28	acrocentric or telocentric	48.36-49.77	47.23-50.81
Sna29	acrocentric or telocentric	na	45.94-50.59
Sna30	acrocentric or telocentric	na	0-7.46
Sna31	acrocentric or telocentric	0.56-13.67	0-7.07
Sna32	acrocentric or telocentric	51.67-52.24	47.13-55.84
Sna33	acrocentric or telocentric	2.31-2.31	0-6
Sna34	acrocentric or telocentric	1.14-1.14	0-4.54
Sna35	acrocentric or telocentric	3.98-3.98	0-11.15
Sna36	acrocentric or telocentric	7.11-9.09	na
Sna37	acrocentric or telocentric	na	49.5-57.54
Sna38	acrocentric or telocentric	49.04-49.04	49.04-53.87
Sna39	acrocentric or telocentric	na	0-23.04
Sna40	acrocentric or telocentric	0-30.94	0-28.1
Sna41	acrocentric or telocentric	2.29-14.06	0-11.21
Sna42	acrocentric or telocentric	na	na
